# Supplementary material for: Chemistry of thiocarboxylates: Synthesis and structures of neutral silver(I) thiocarboxylates with triphenylphosphine †
Source: Royal Society of Chemistry journal article supplement (doi:10.1039/b007122f), 2001-01-01

**Chemistry of Thiocarboxylates: Synthesis and Structures of neutral Silver(I) Thiocarboxylates with Triphenylphosphine.**

**Theivanayagam C. Deivaraj and Jagadese J. Vittal**

Department of Chemistry, National University of Singapore,

3 Science Drive 3, Singapore 117543.

**Supporting Information:**

Figure 1. Low temperature 31P NMR of compound **2** in CD2Cl2.

Figure 2. Low temperature 31P NMR of compound **3** in CD2Cl2.

Figure 3. Low temperature 31P NMR of compound **4** in CD2Cl2 and toluene.

Figure 4. Low temperature 31P NMR of compound **5** in CD2Cl2.

Figure 5. Low temperature 31P NMR of compound **6** in CD2Cl2 and toluene.

Figure 6. X-ray powder diffraction pattern of (a) simulated from the crystal data of **3**, (b) bulk and (c) the unsolvated compound of **3**.

Figure 7. X-ray powder diffraction pattern of (a) simulated from the crystal data of **4**, (b) bulk and (c) the unsolvated compound of **4**.

Figure 8. X-ray powder diffraction pattern of (a) simulated from the crystal data of **5**, (b) bulk and (c) the unsolvated compound of **5**.

Figure 9. X-ray powder diffraction pattern of (a) simulated from the crystal data of **6**, (b) bulk and (c) the unsolvated compound of **6**.

Figure 10. X-ray powder diffraction pattern of (a) simulated from the crystal data for the compound [(-SC{O}Me-*S*)(-SC{O}Me-*S*,*O*){Cu(PPh3}2] and (b) the pattern observed for compound **1**.


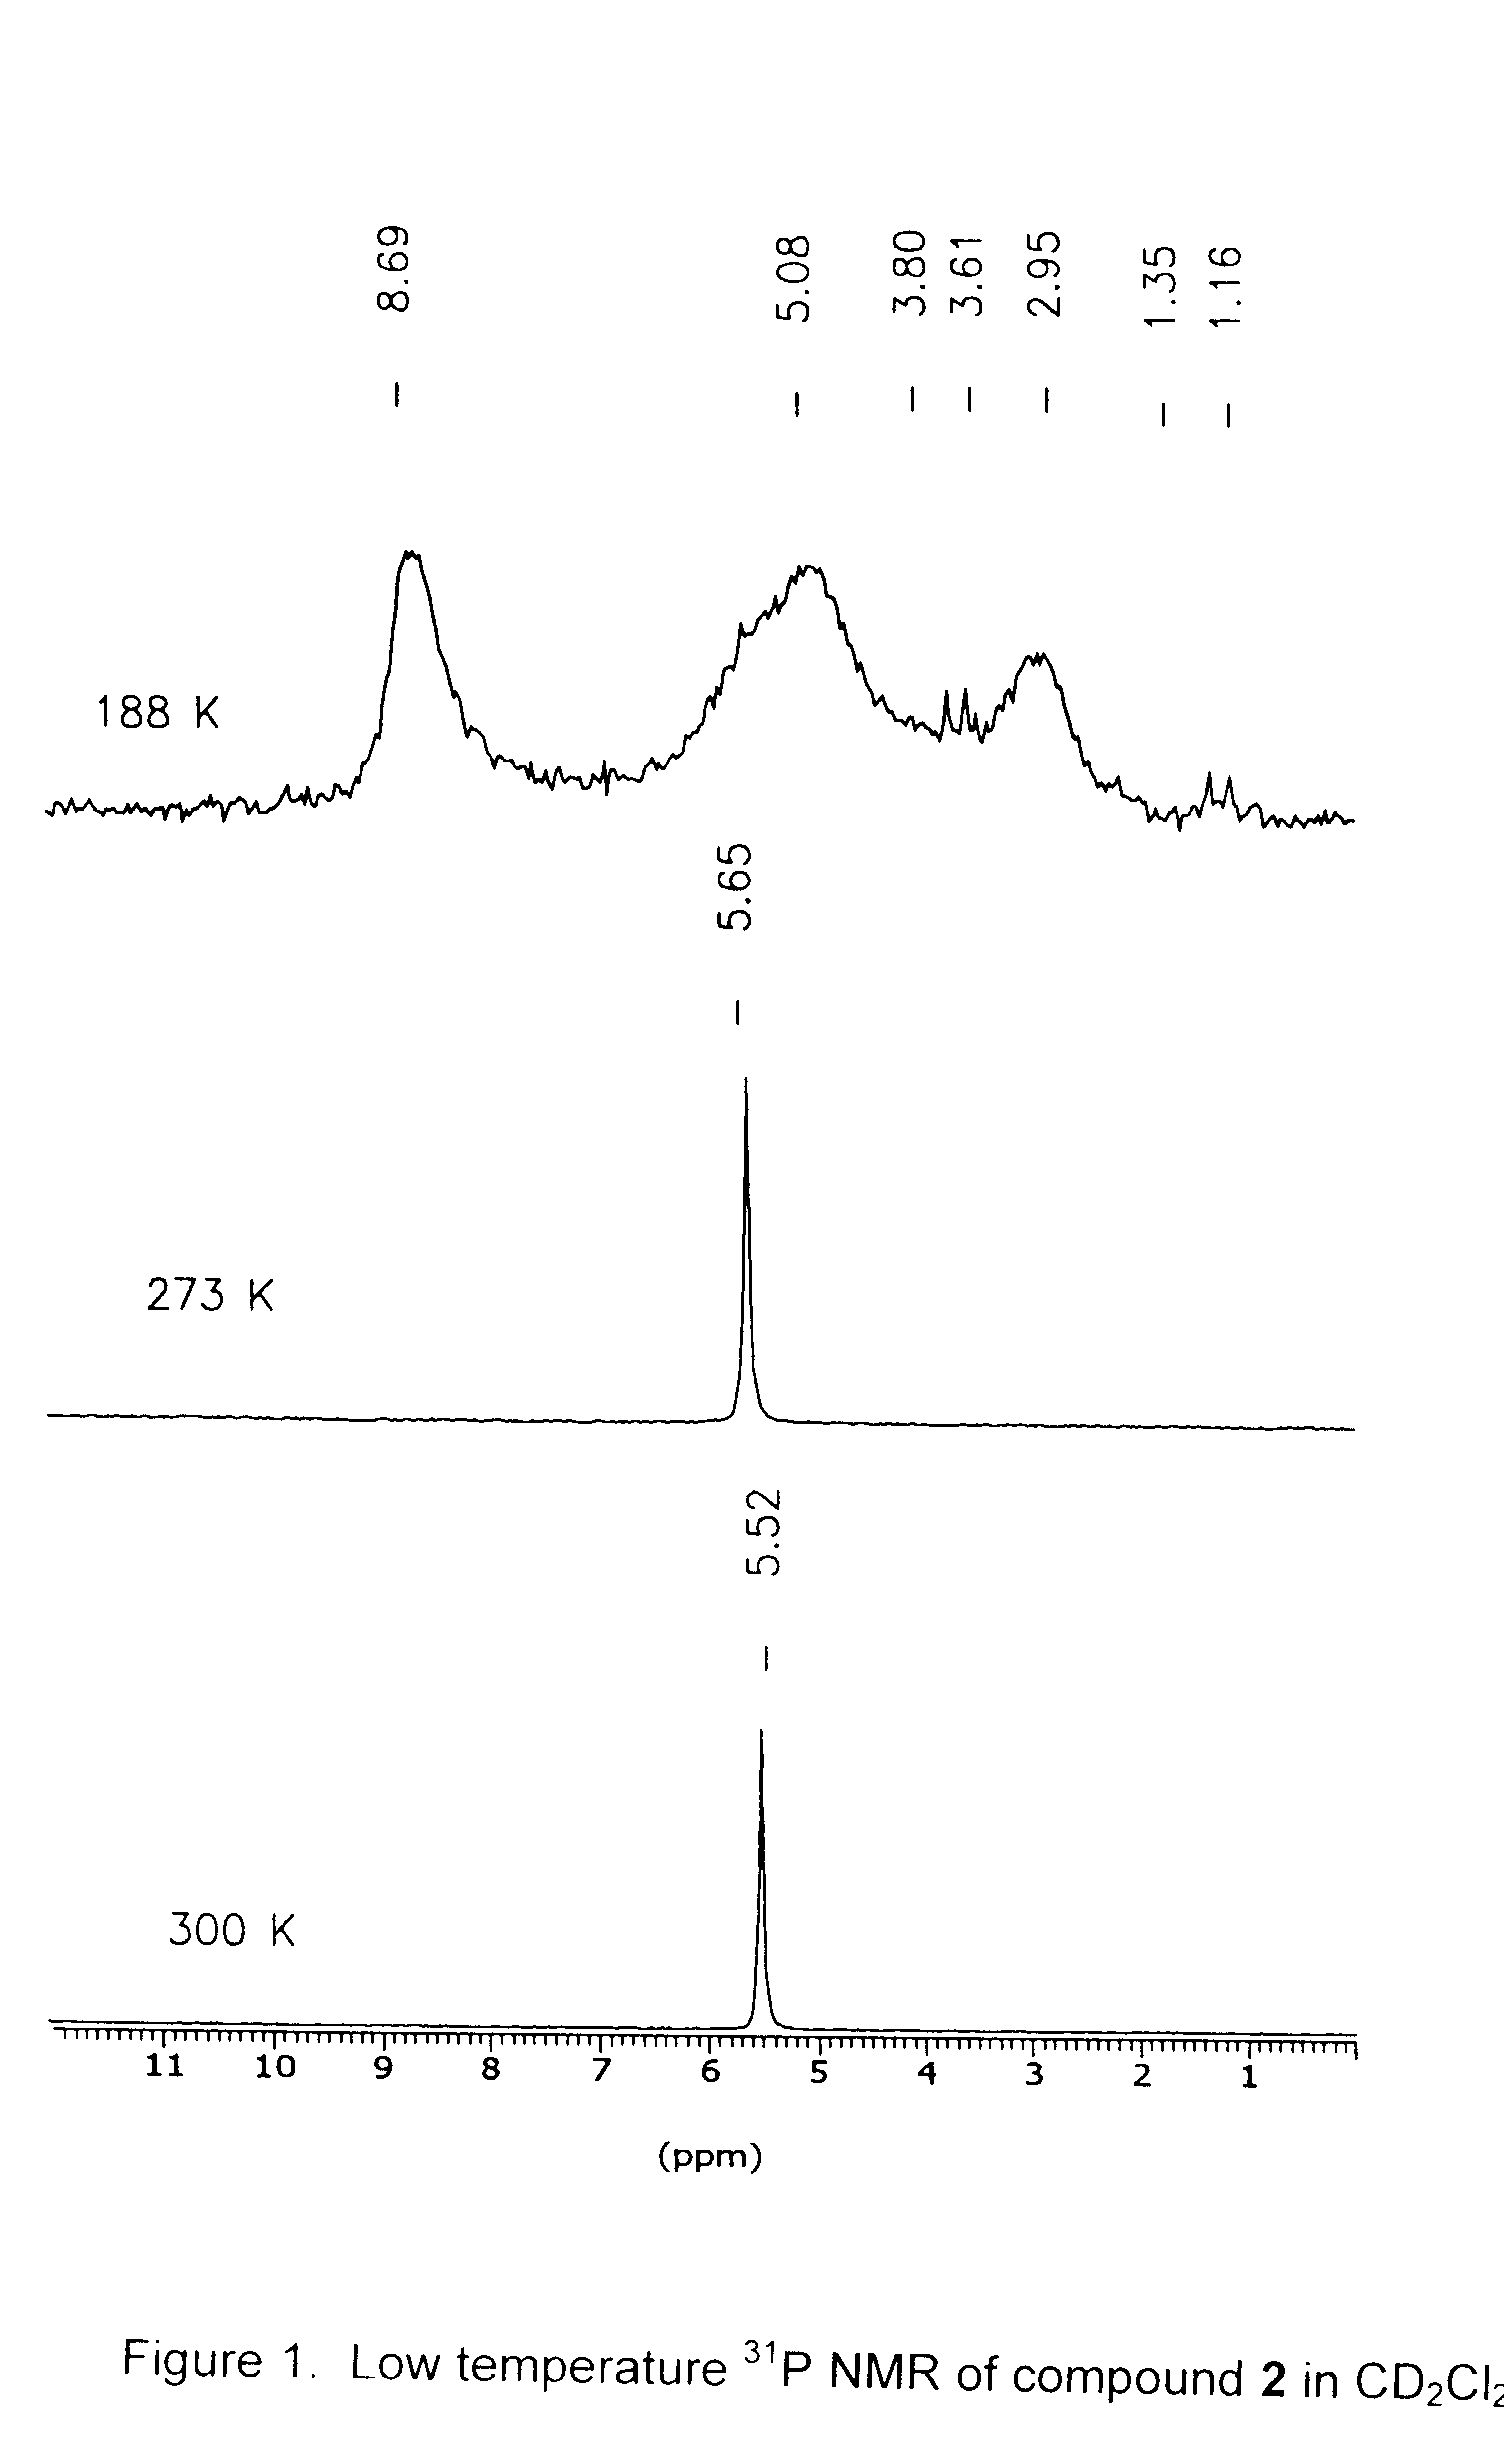


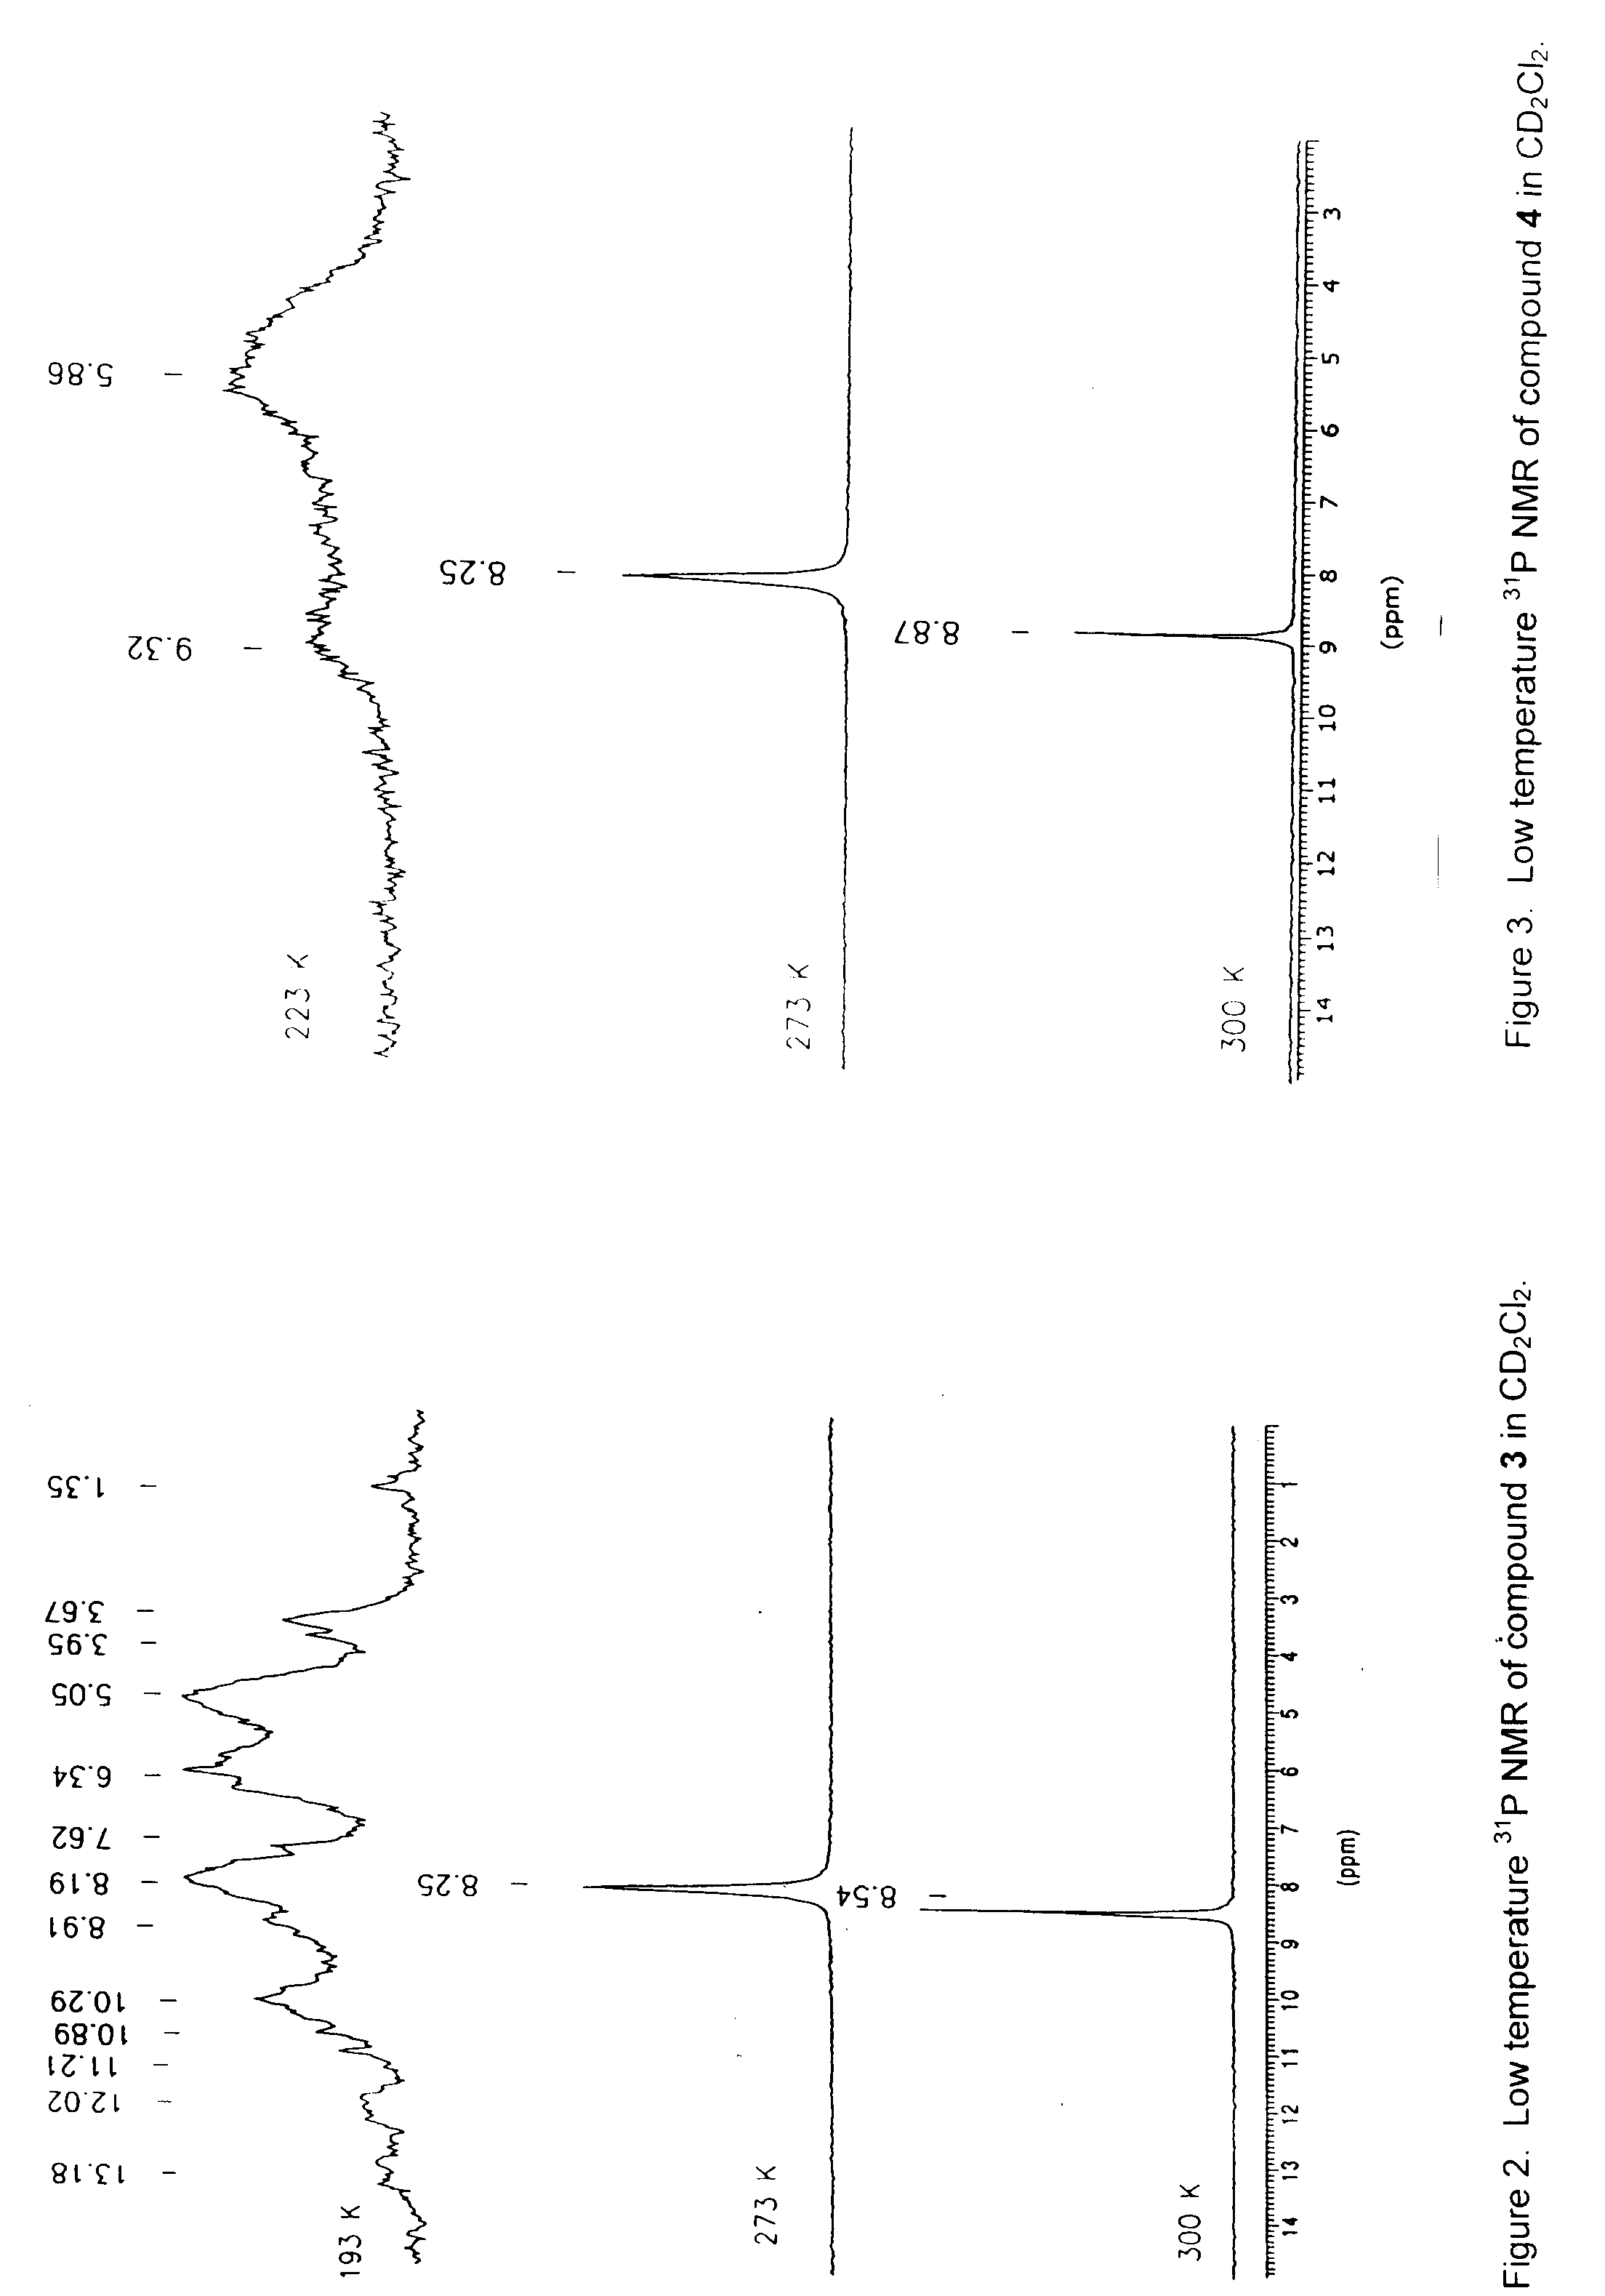


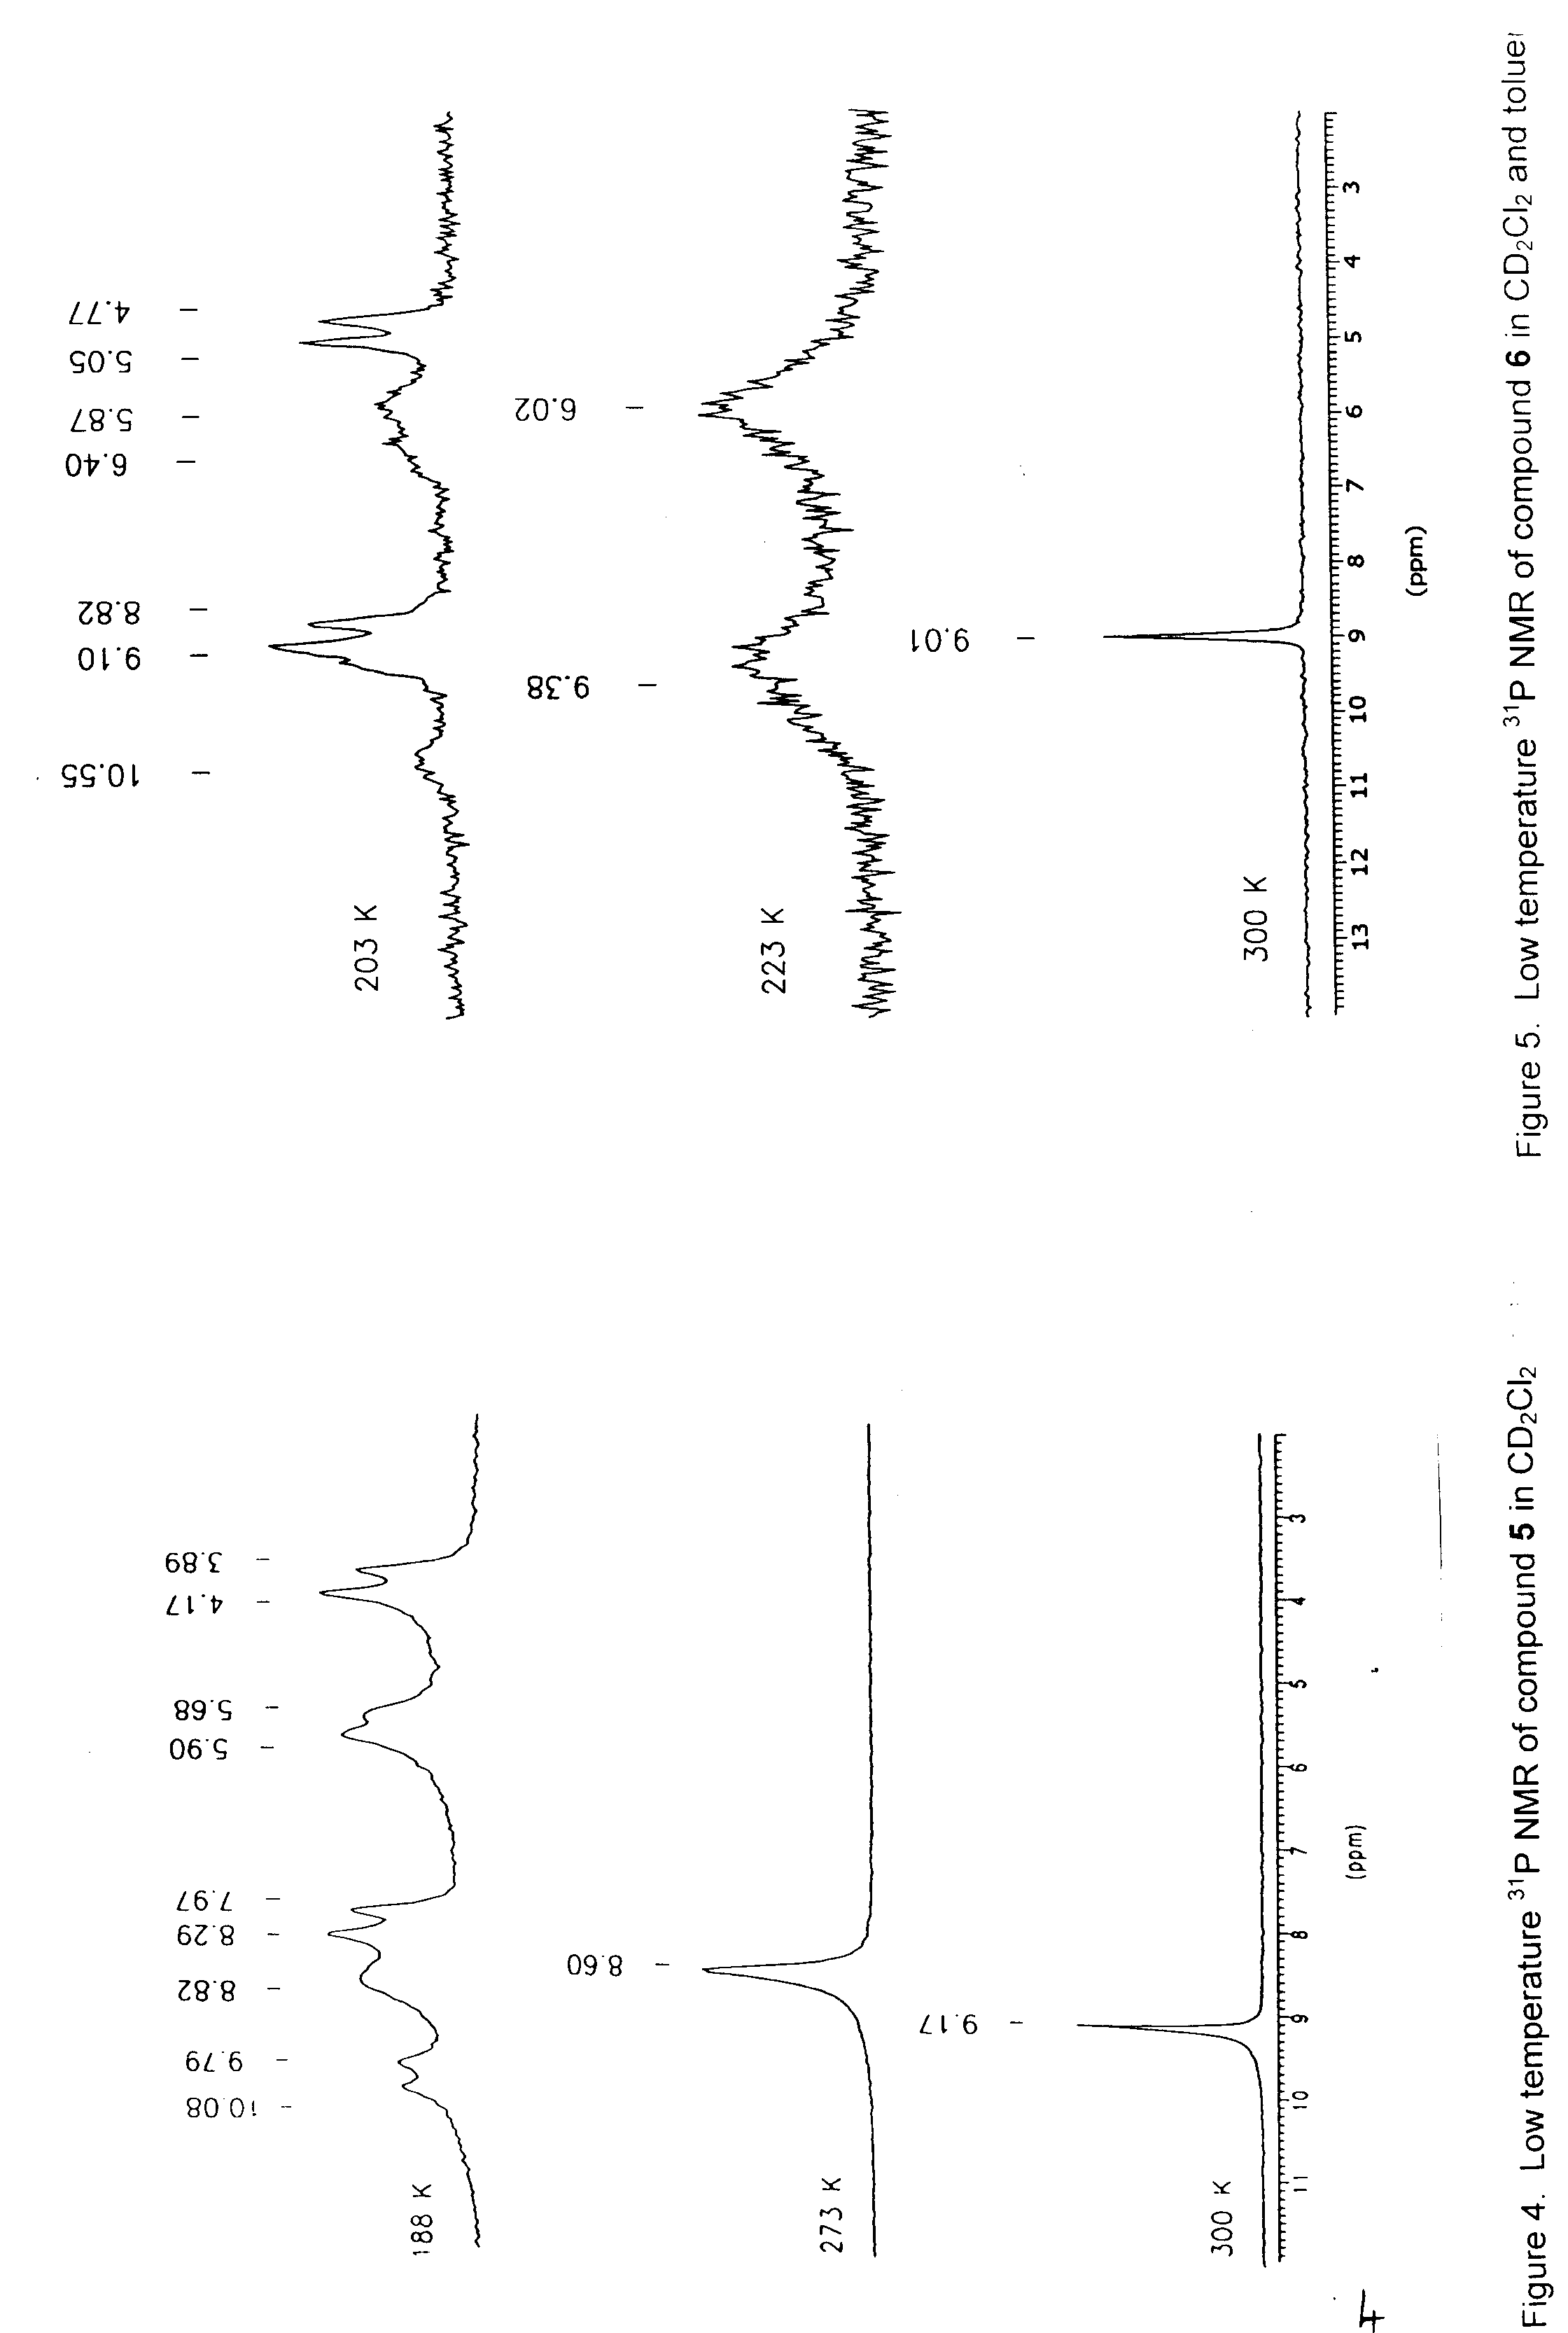


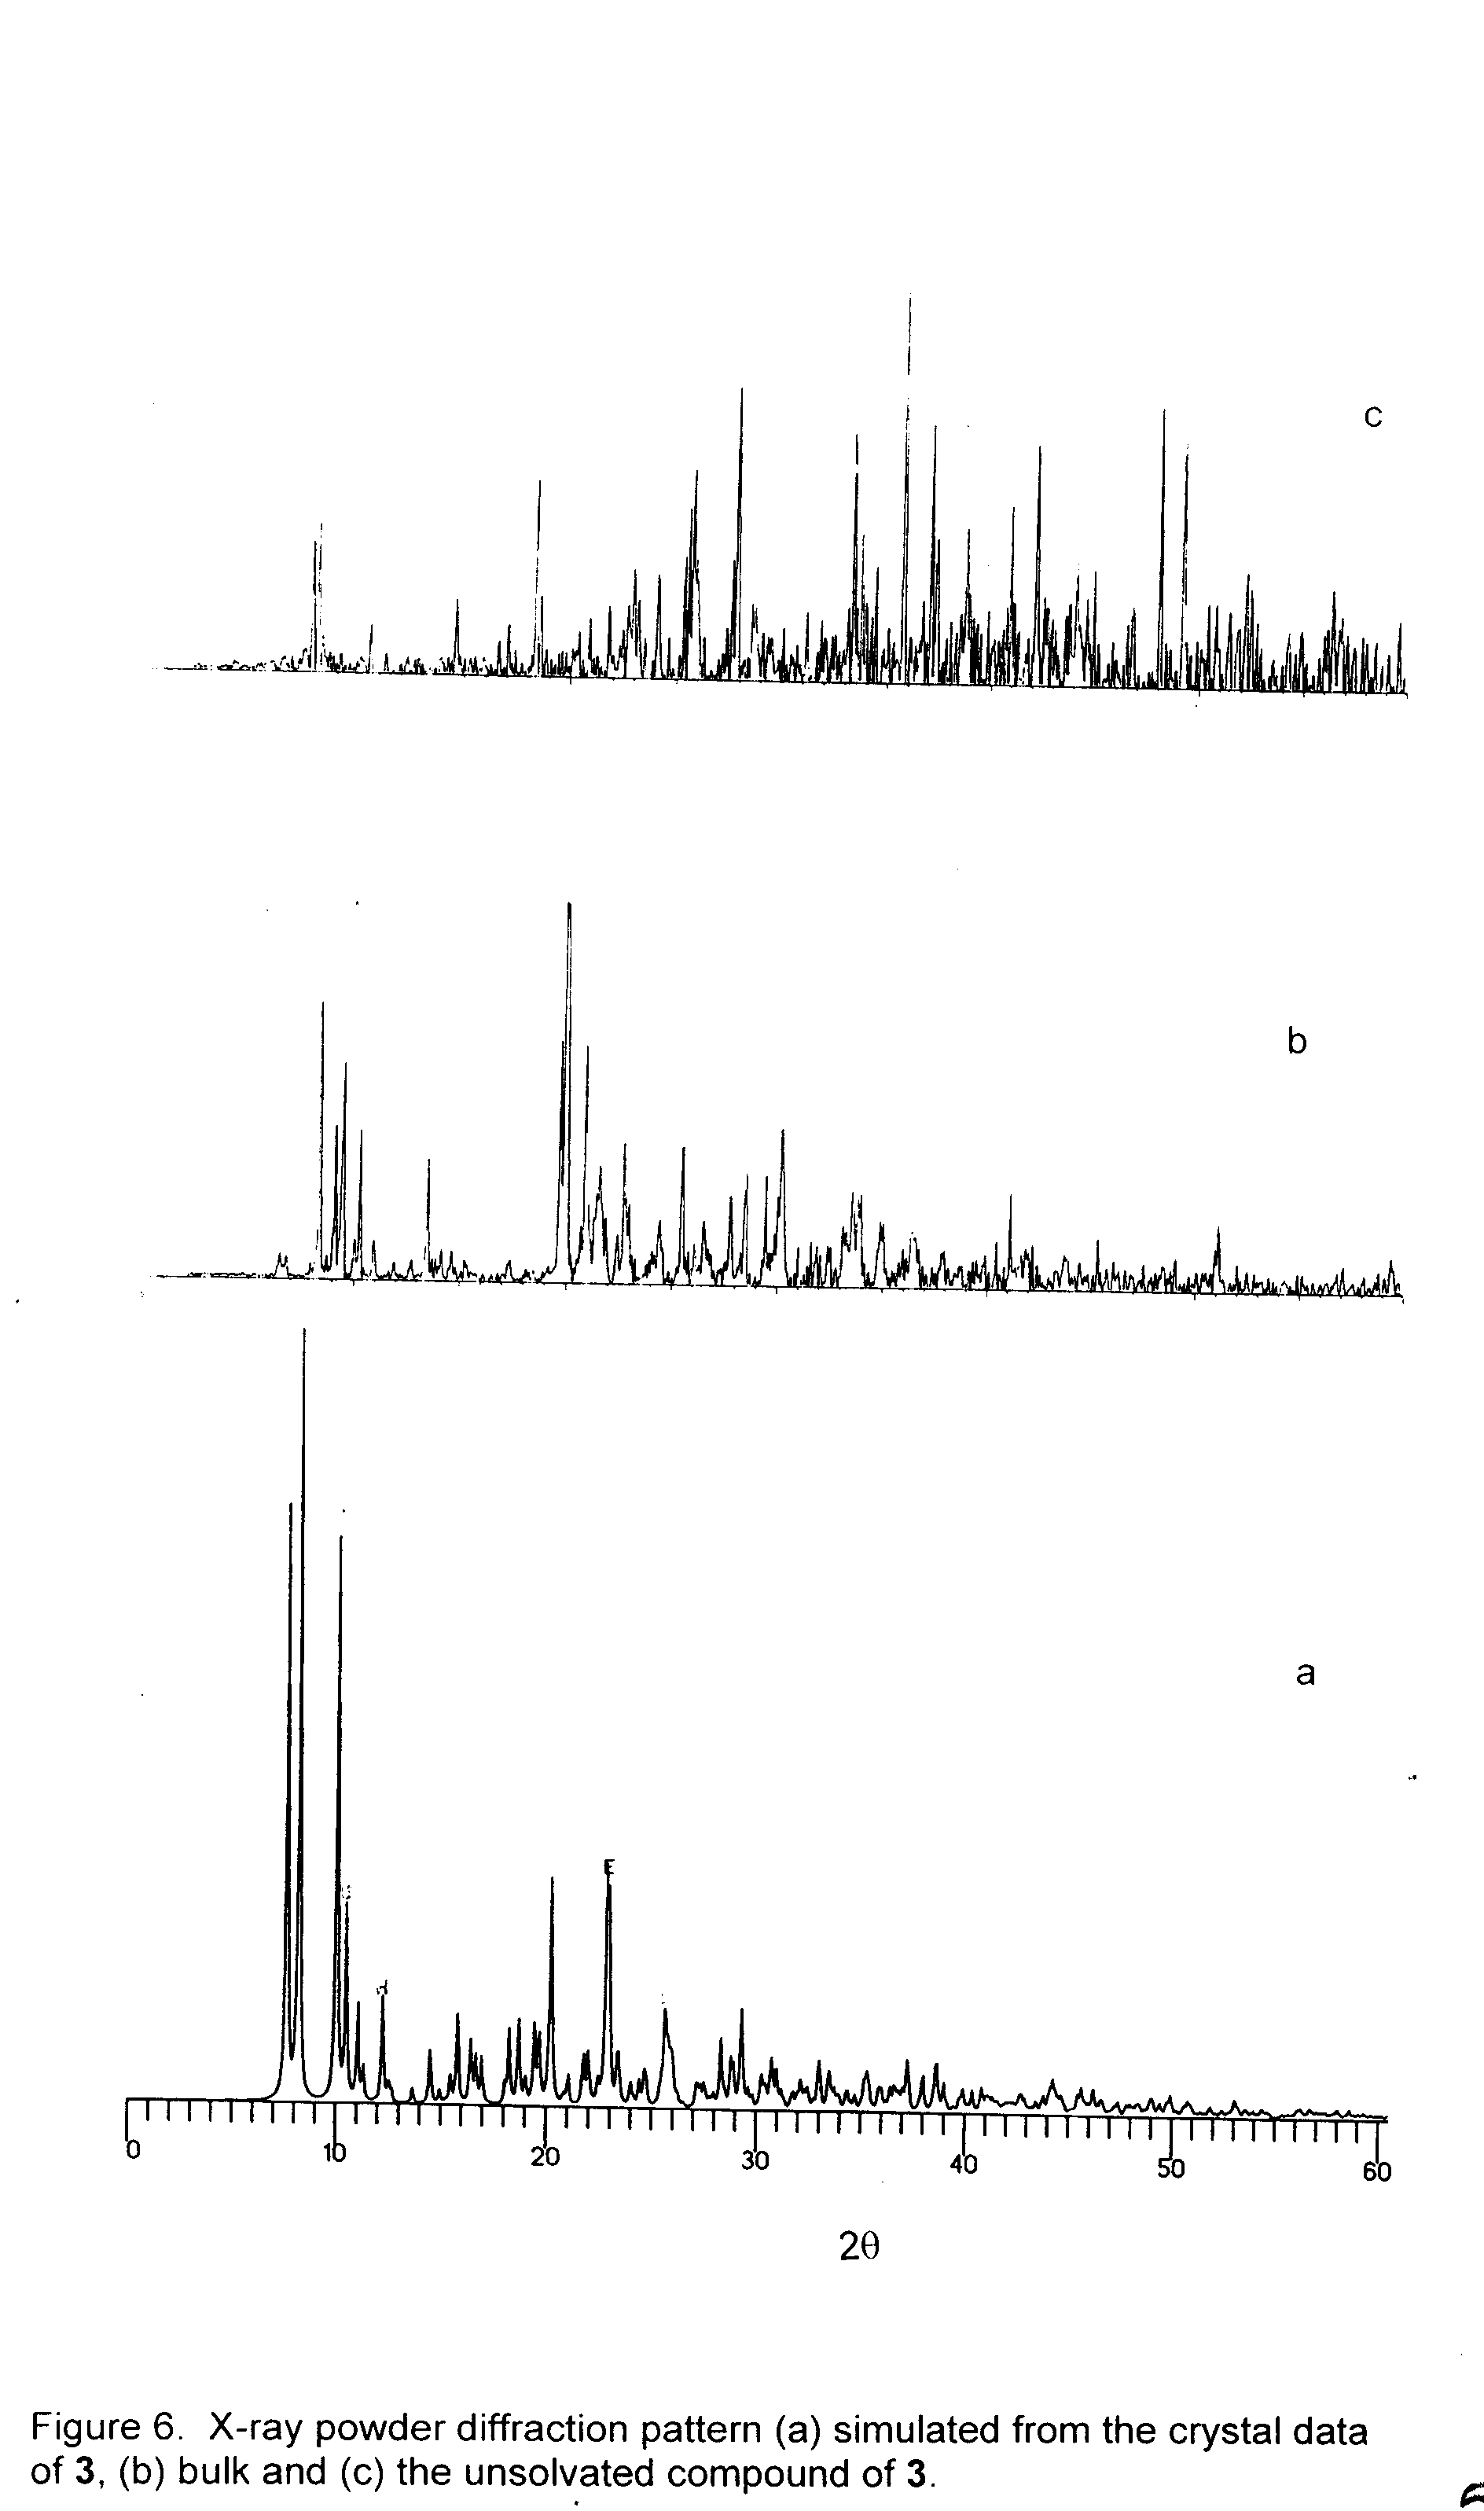


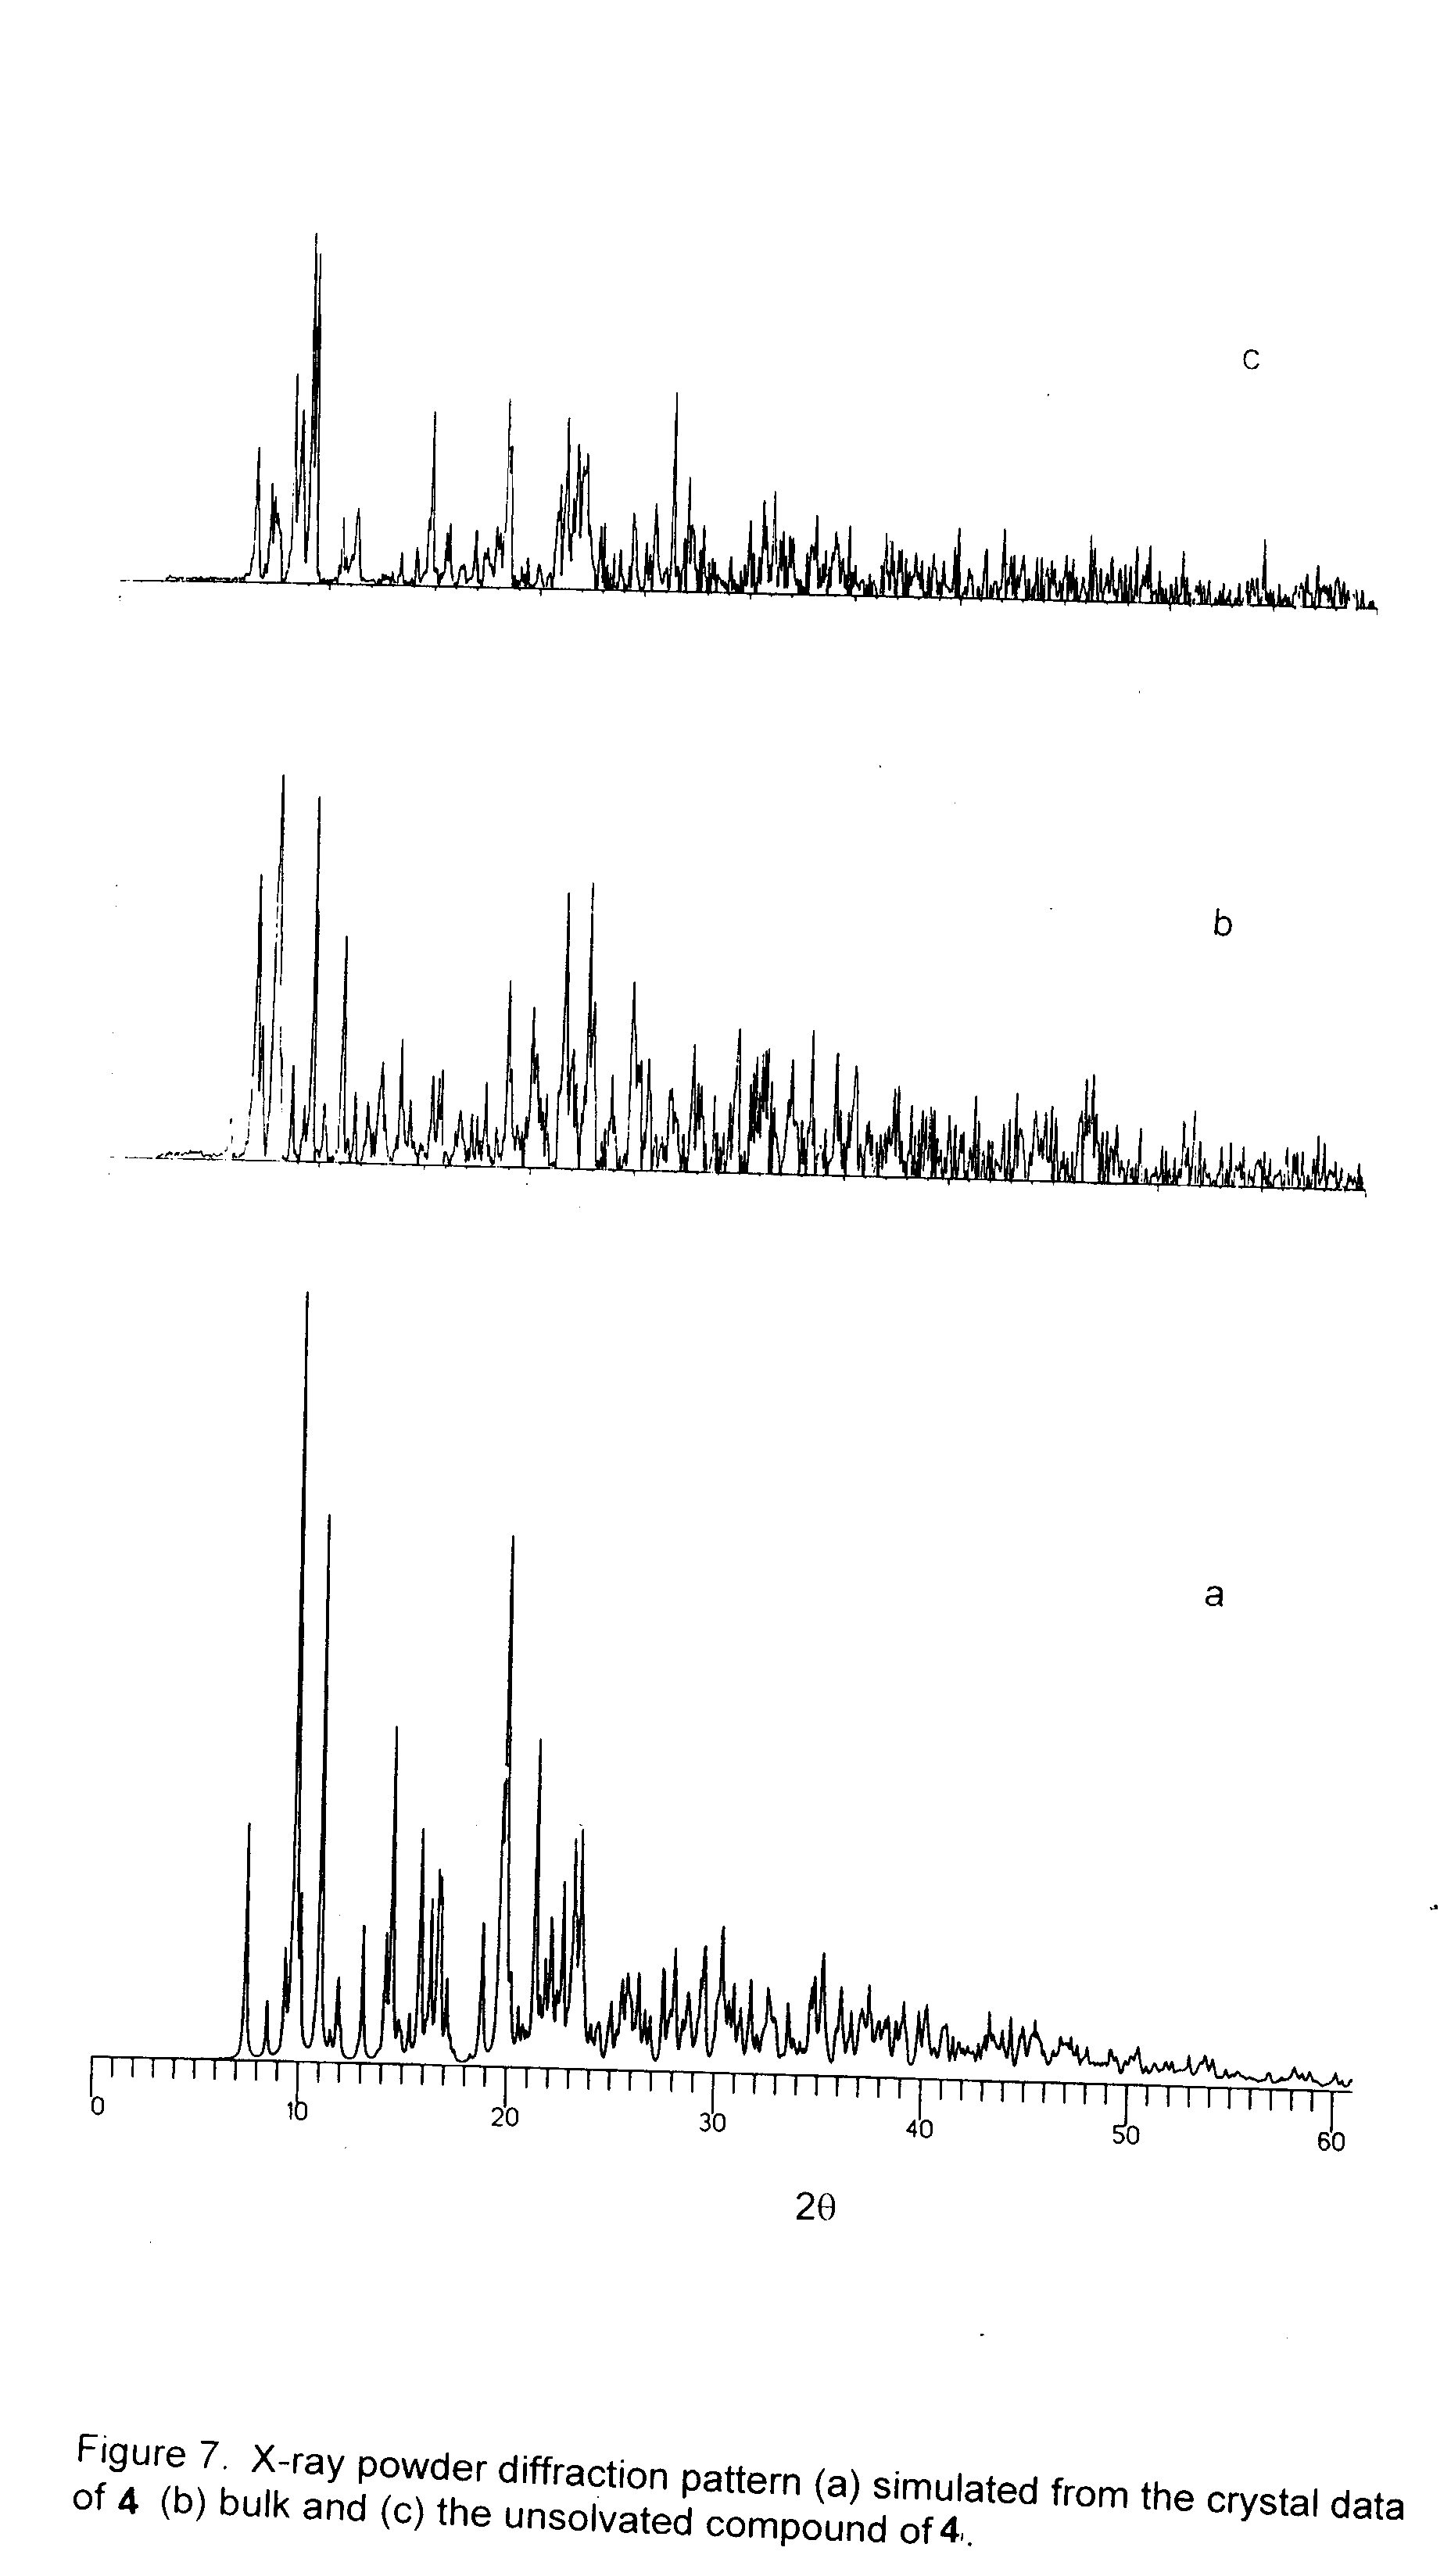


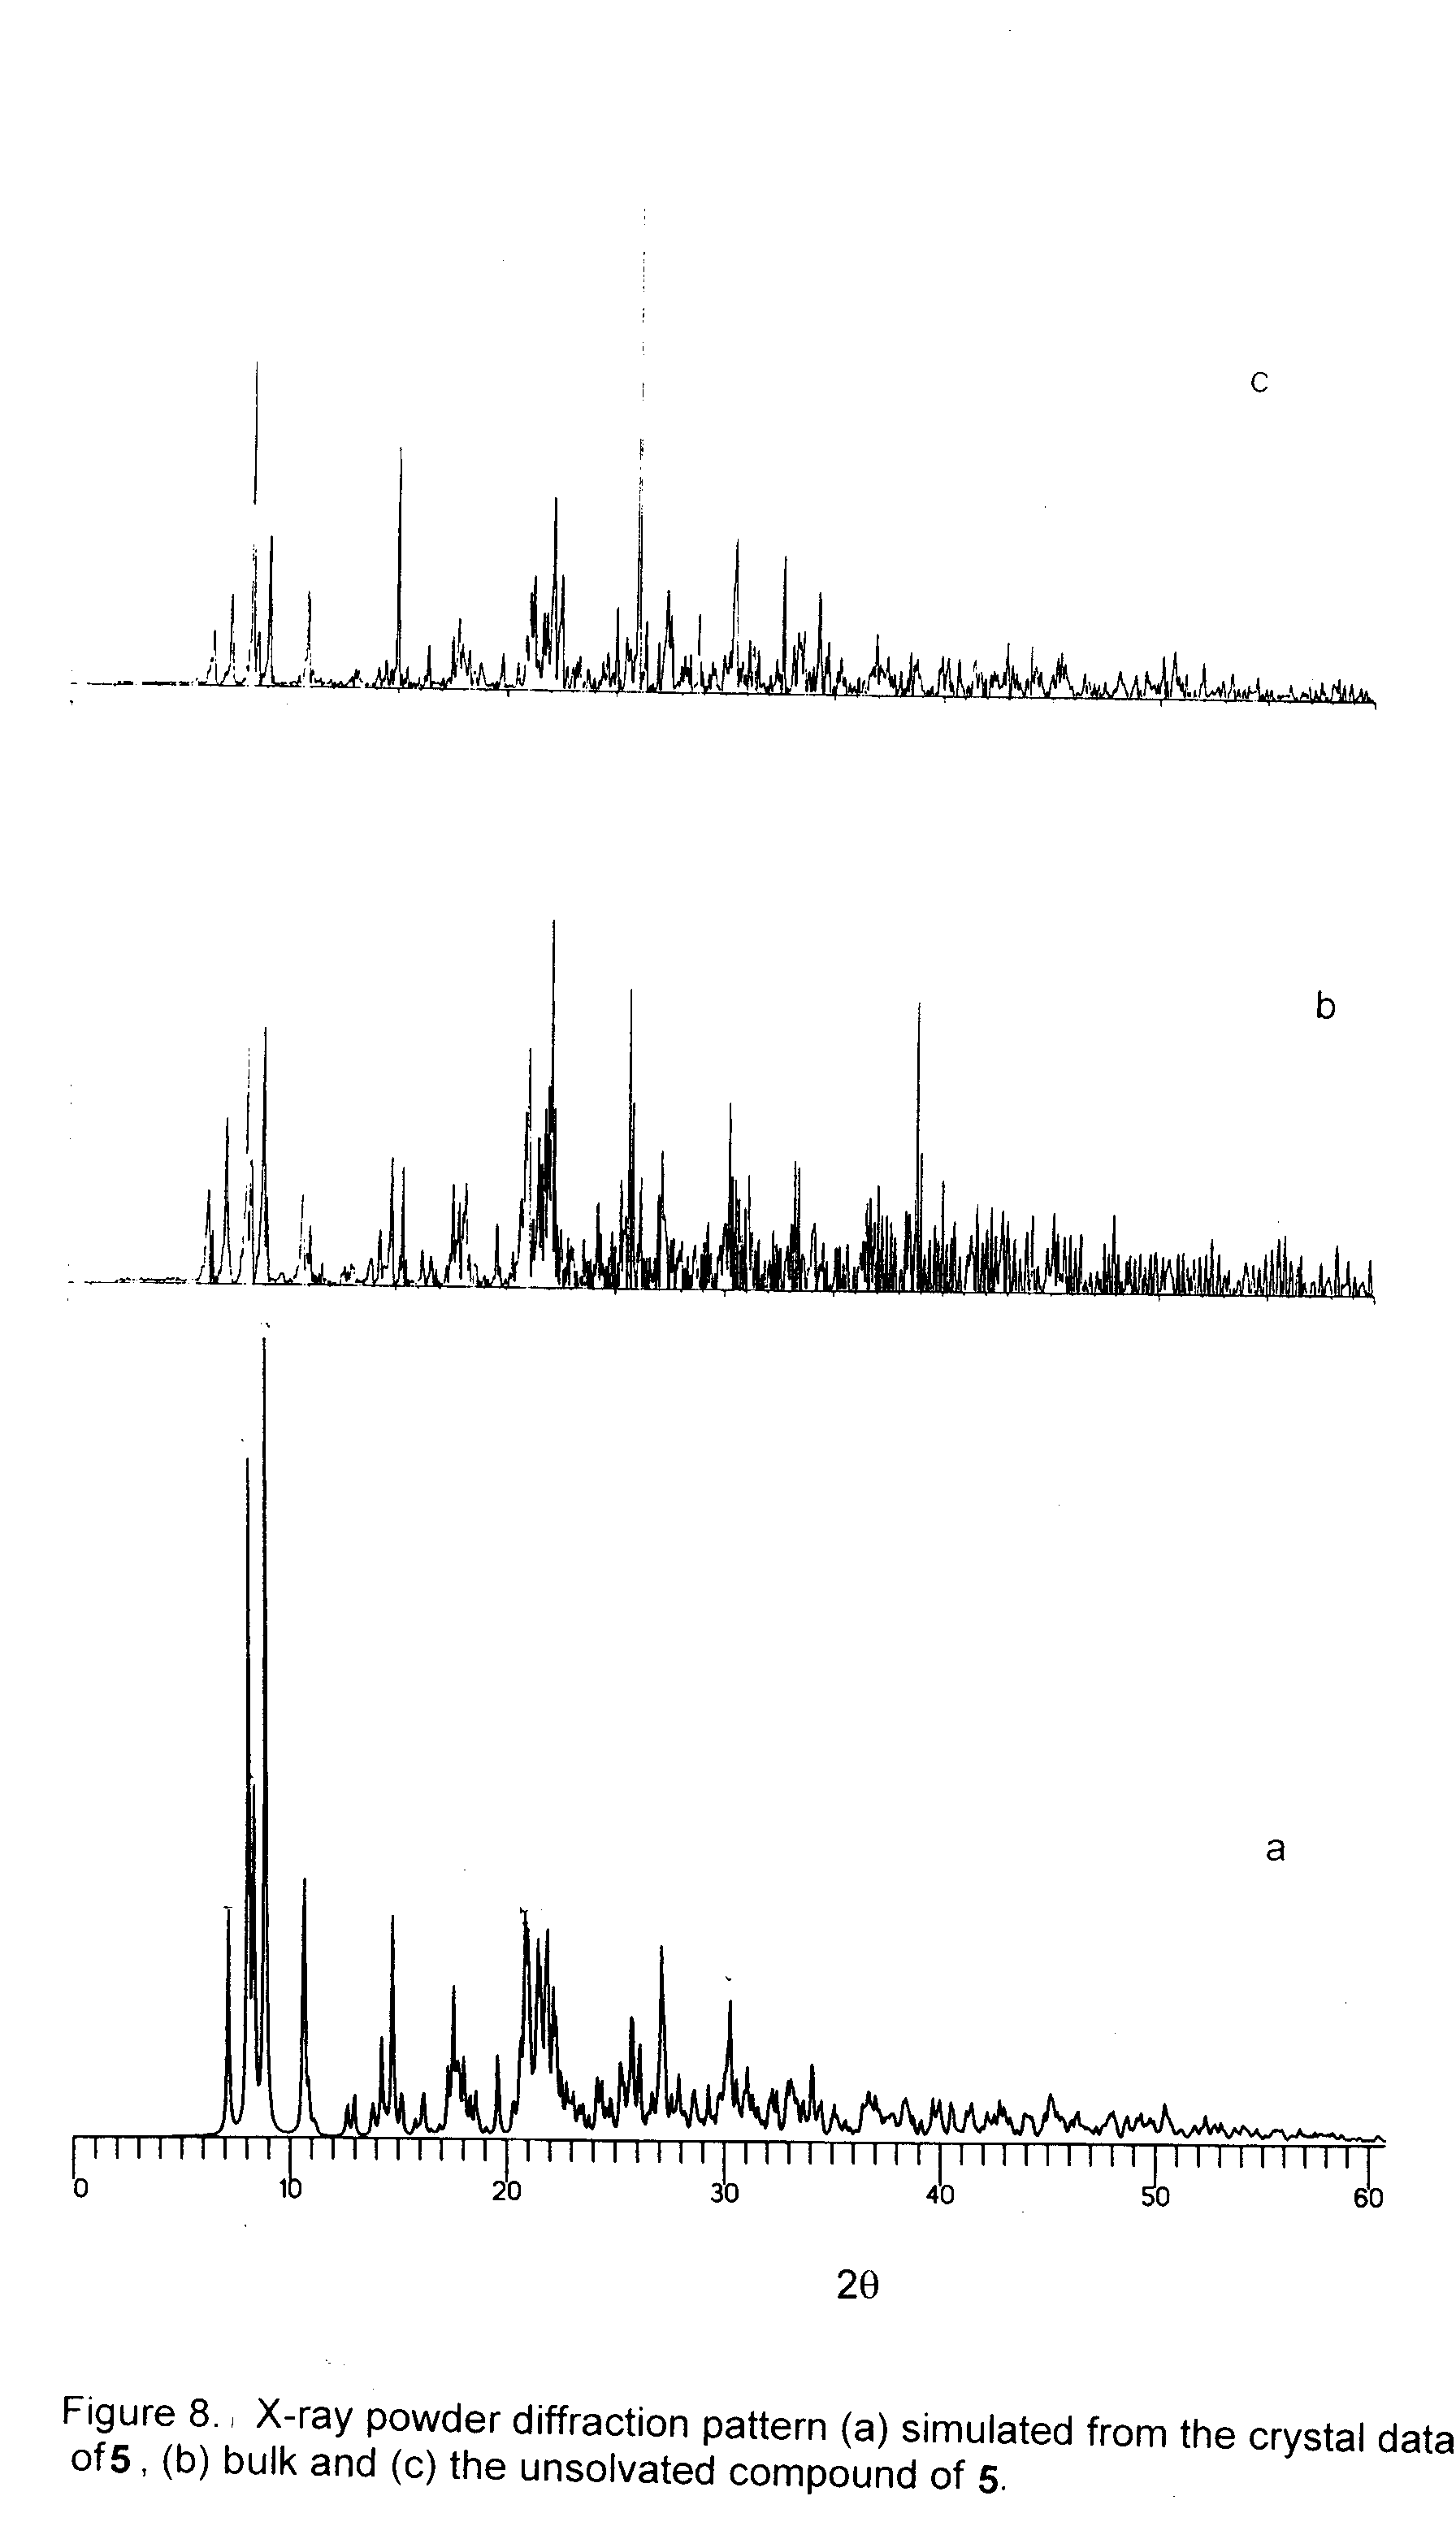


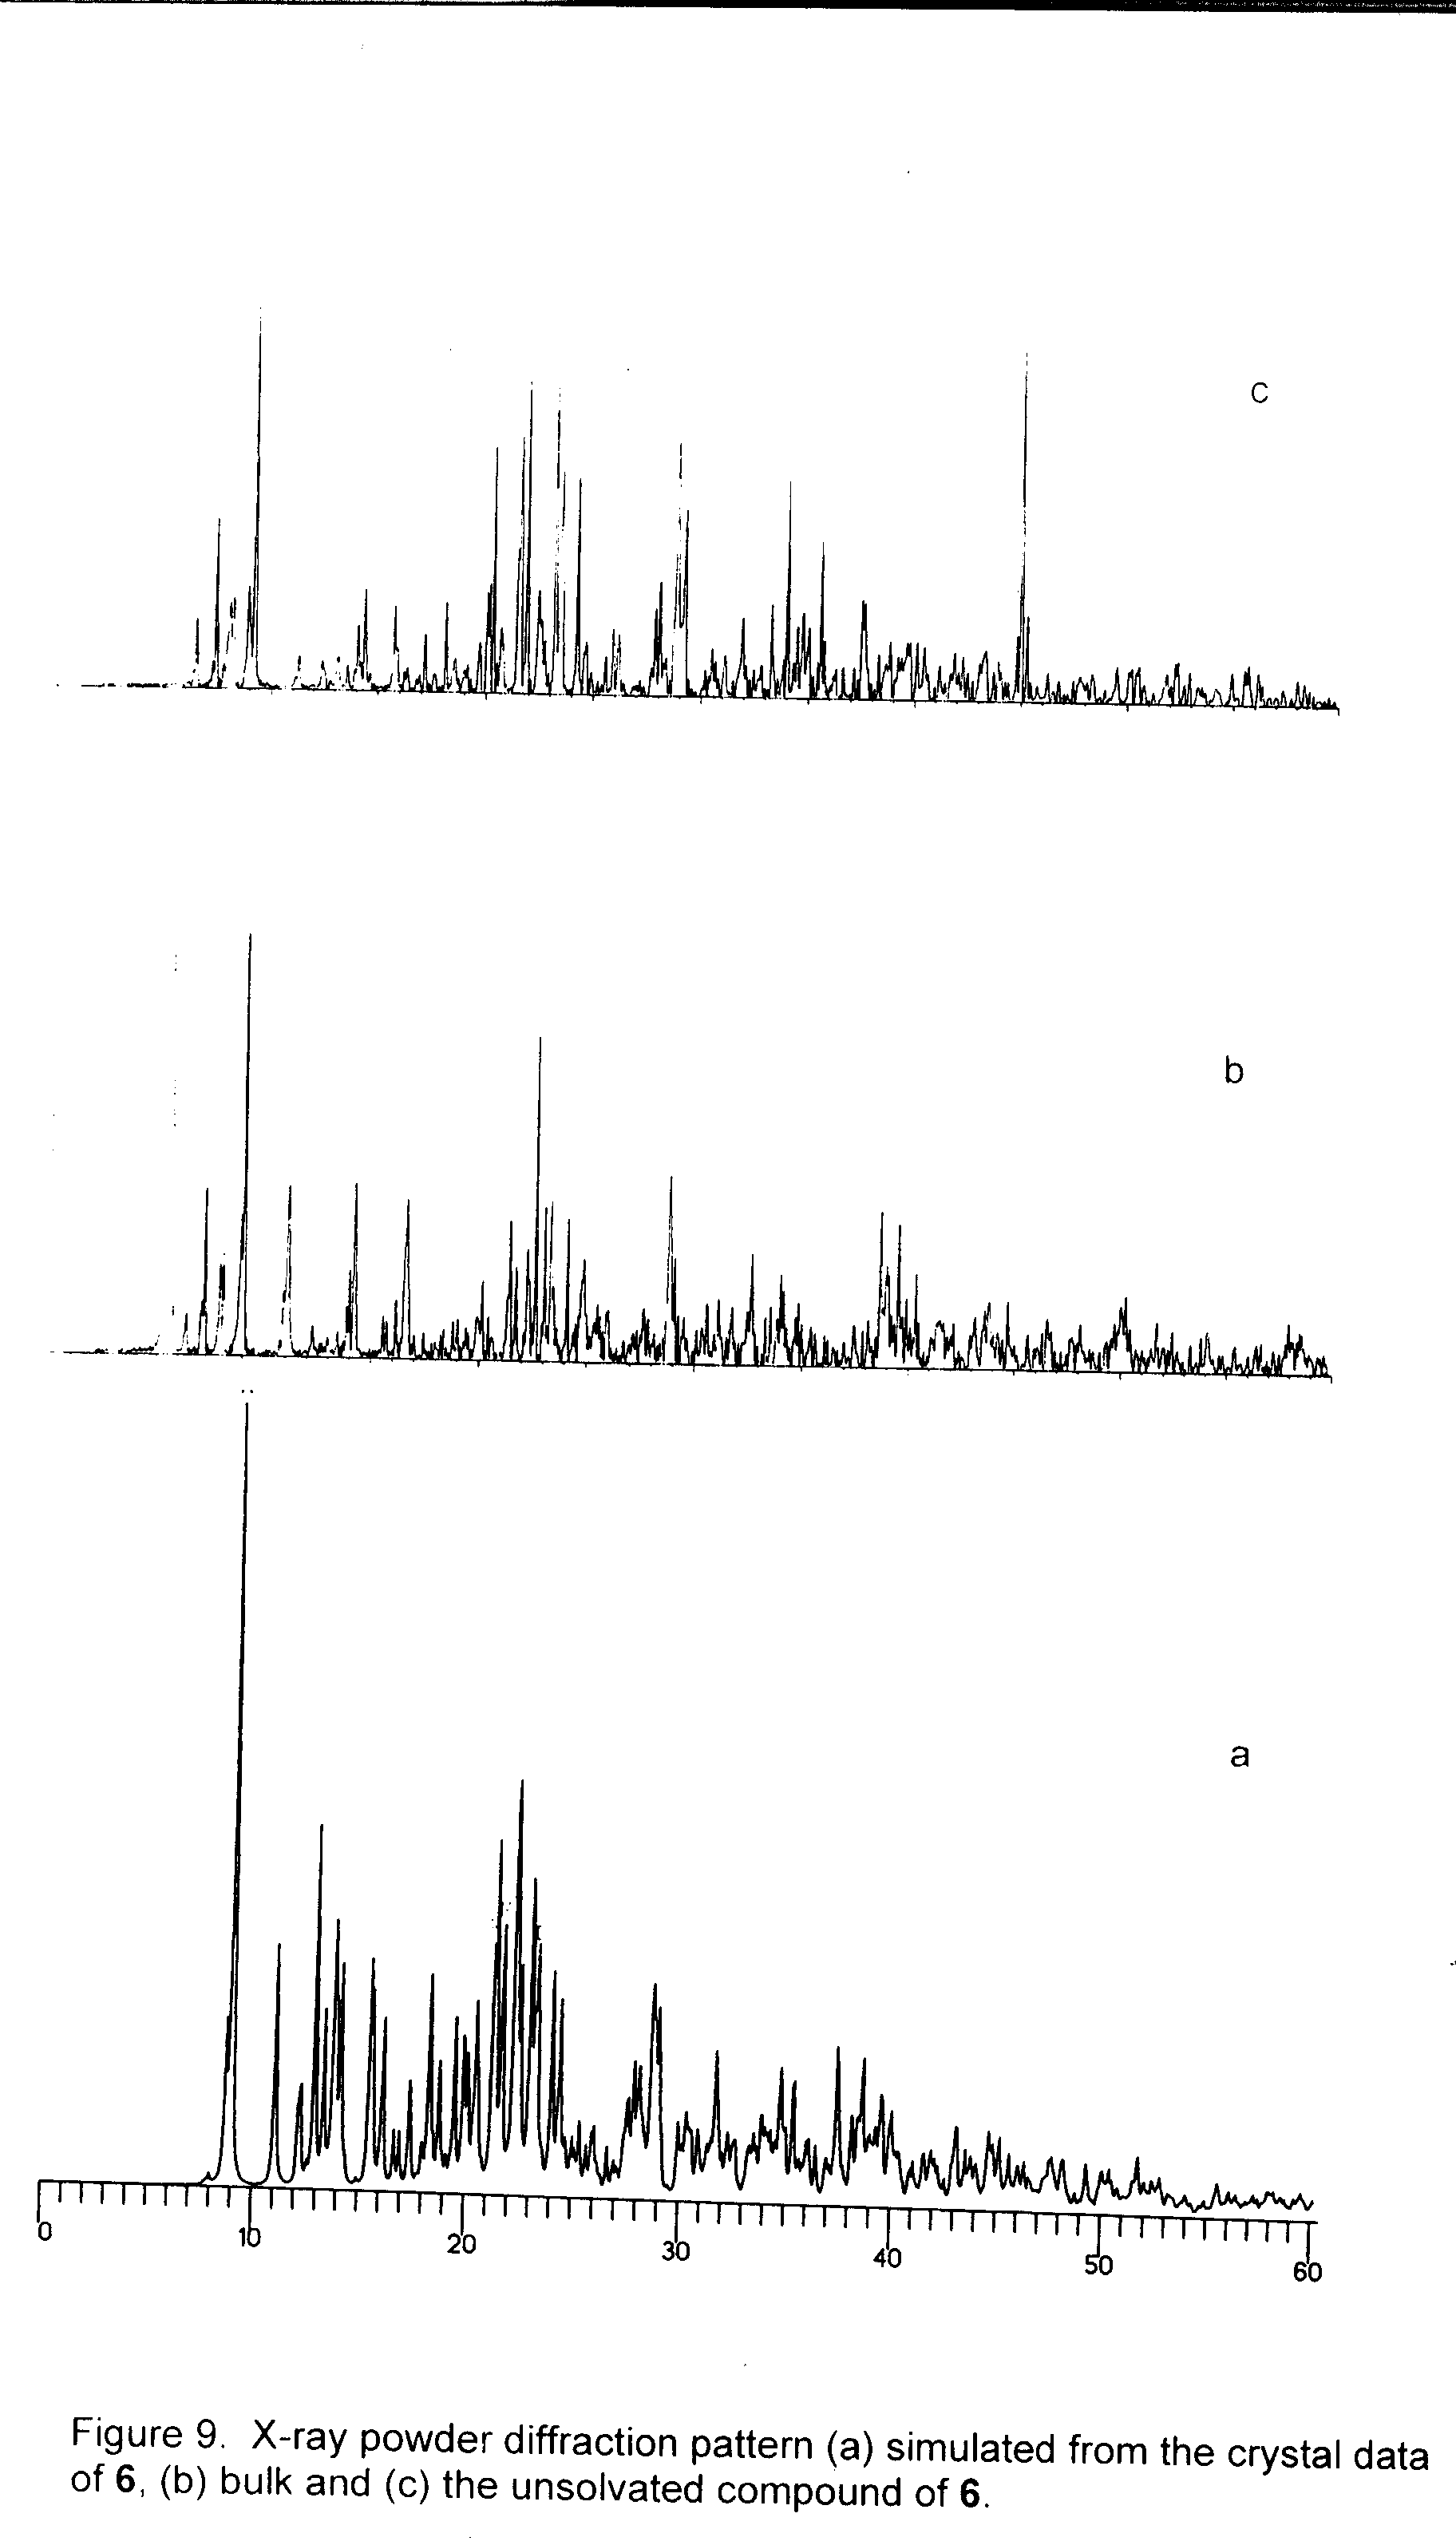


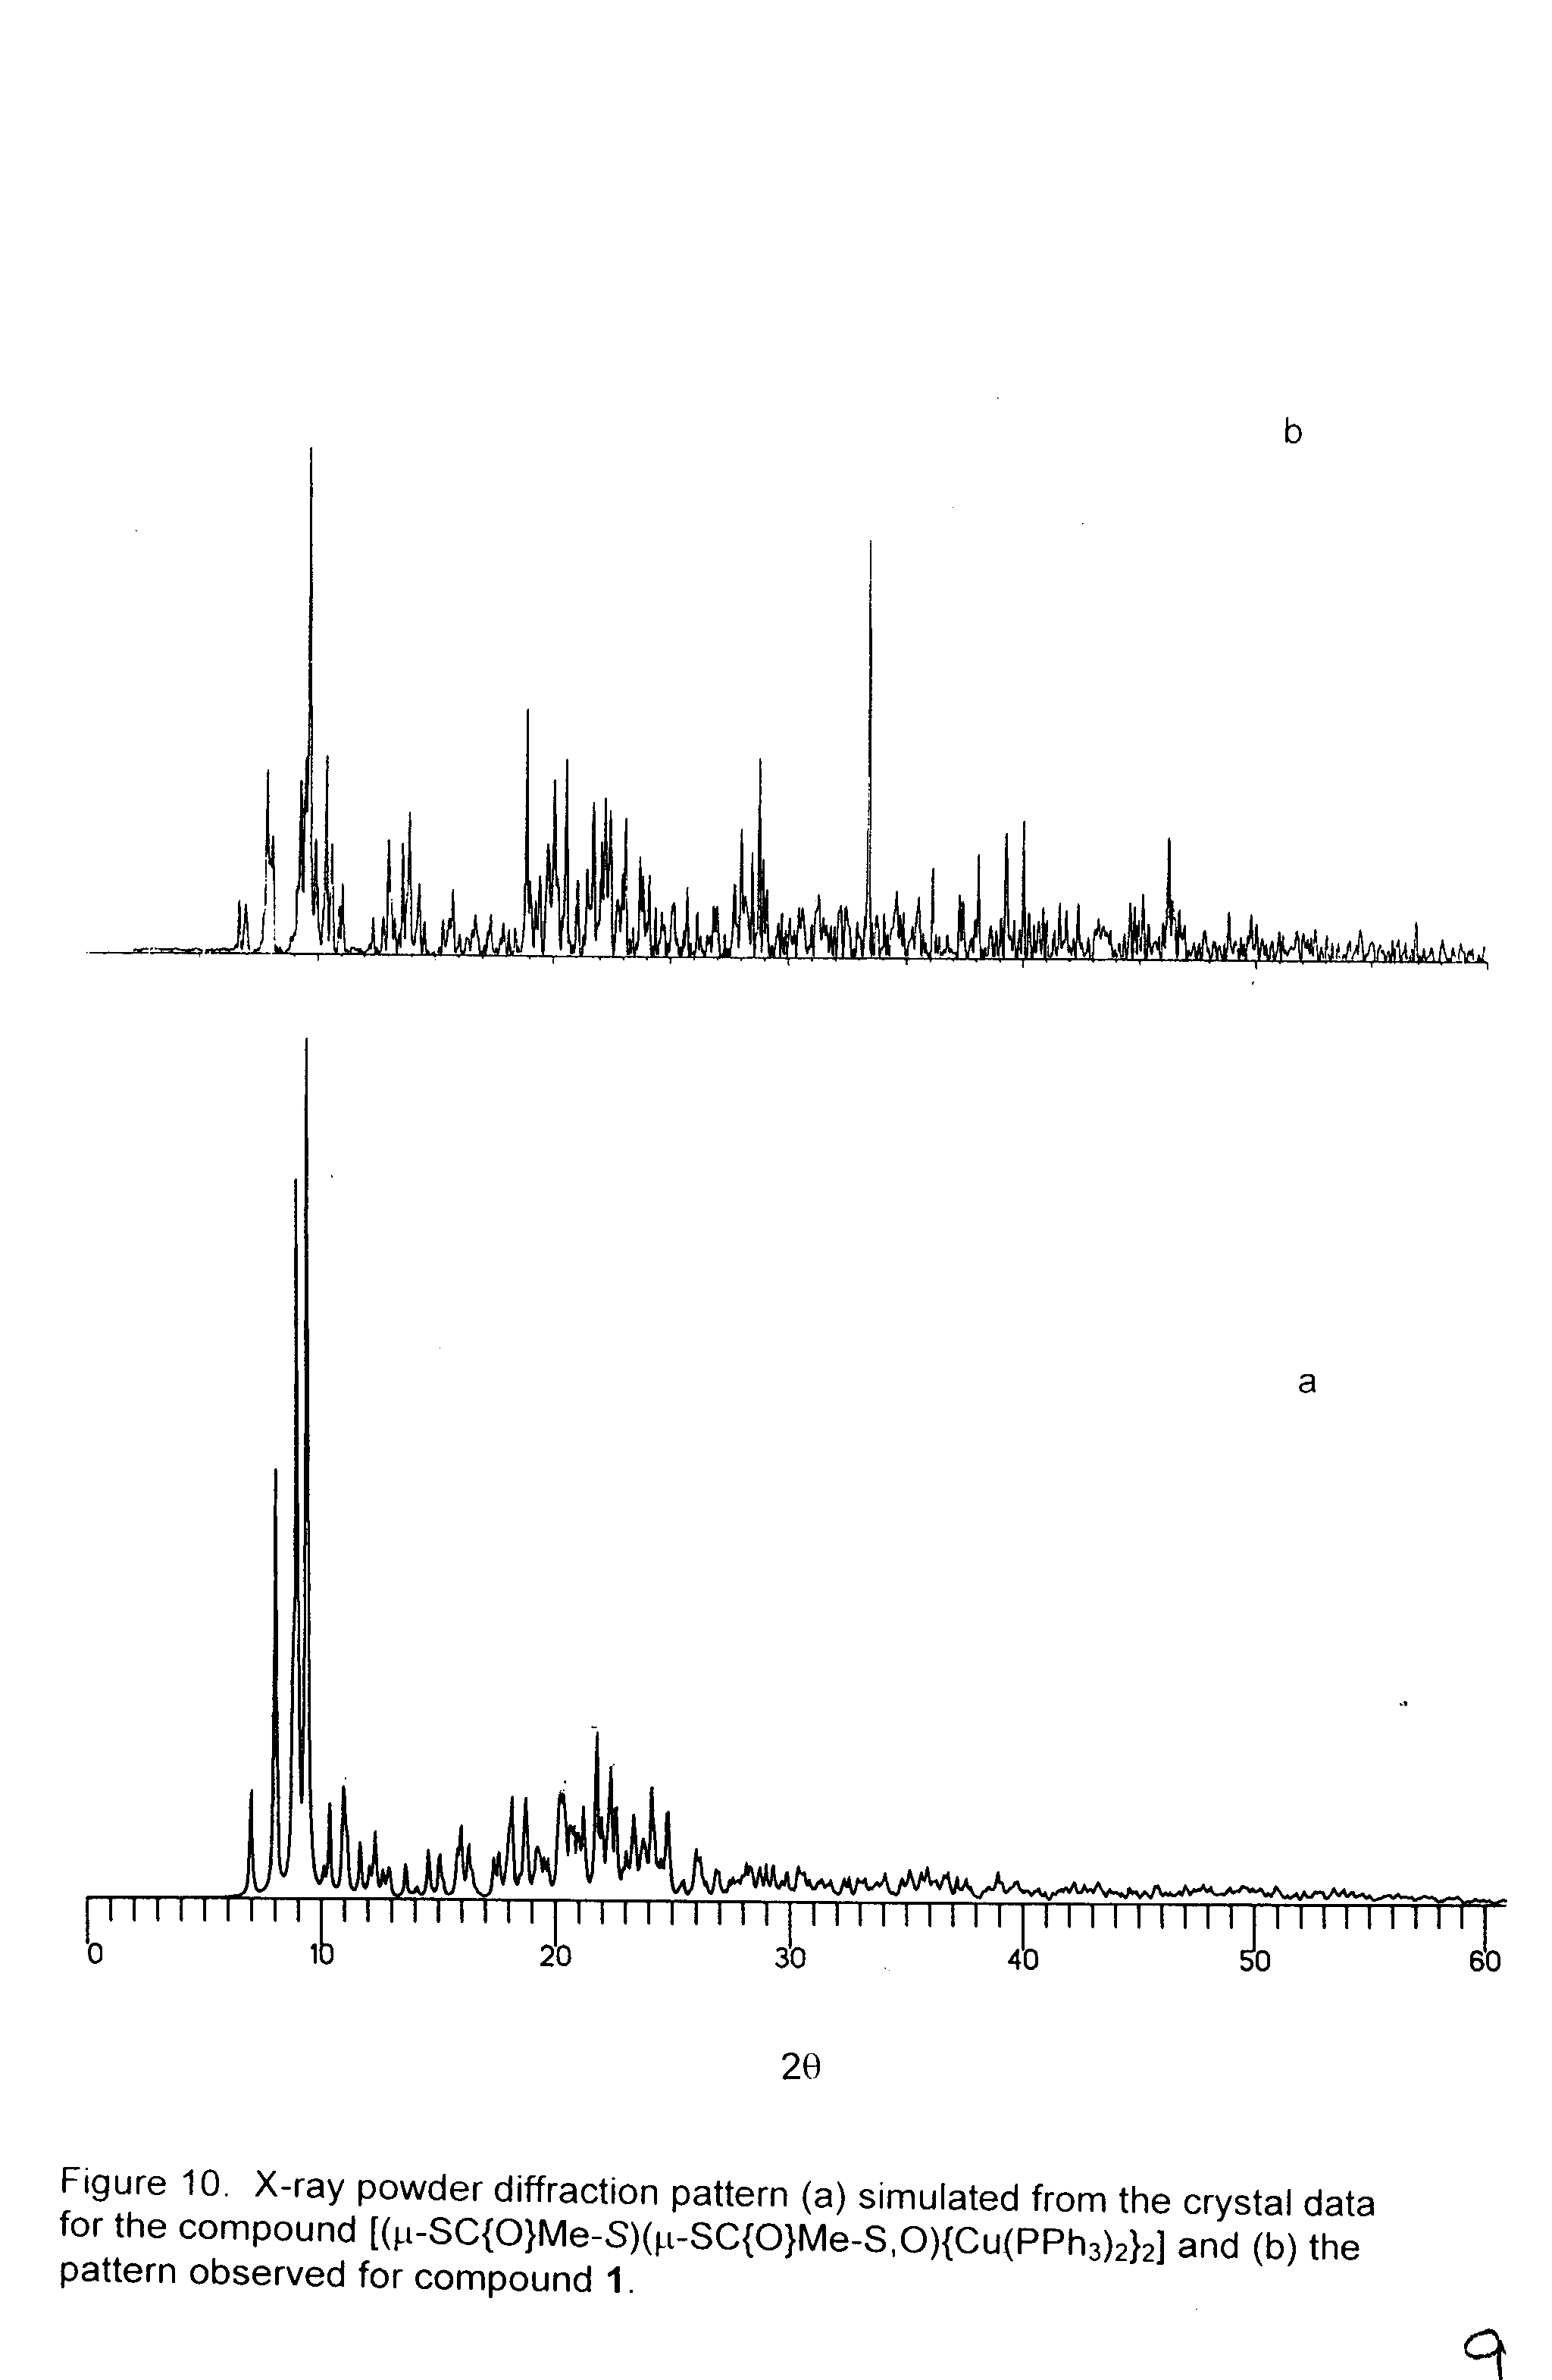

Supplement: b007122f.doc [file b007122f.doc]
